# Supplementary material
Source: Springer Nature journal article supplement (https://www.springermedizin.de/resource/supplementary/12913_2007_701_MOESM3_ESM.pdf/9535346)

Prescription Rate (%)

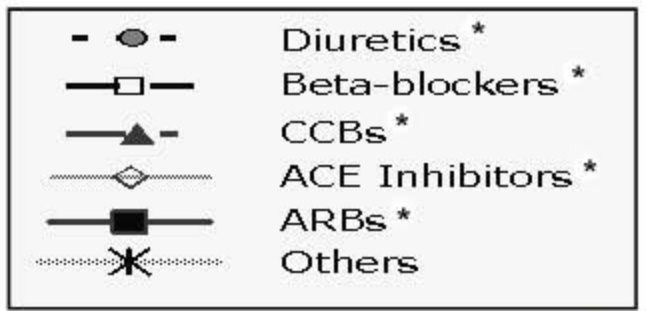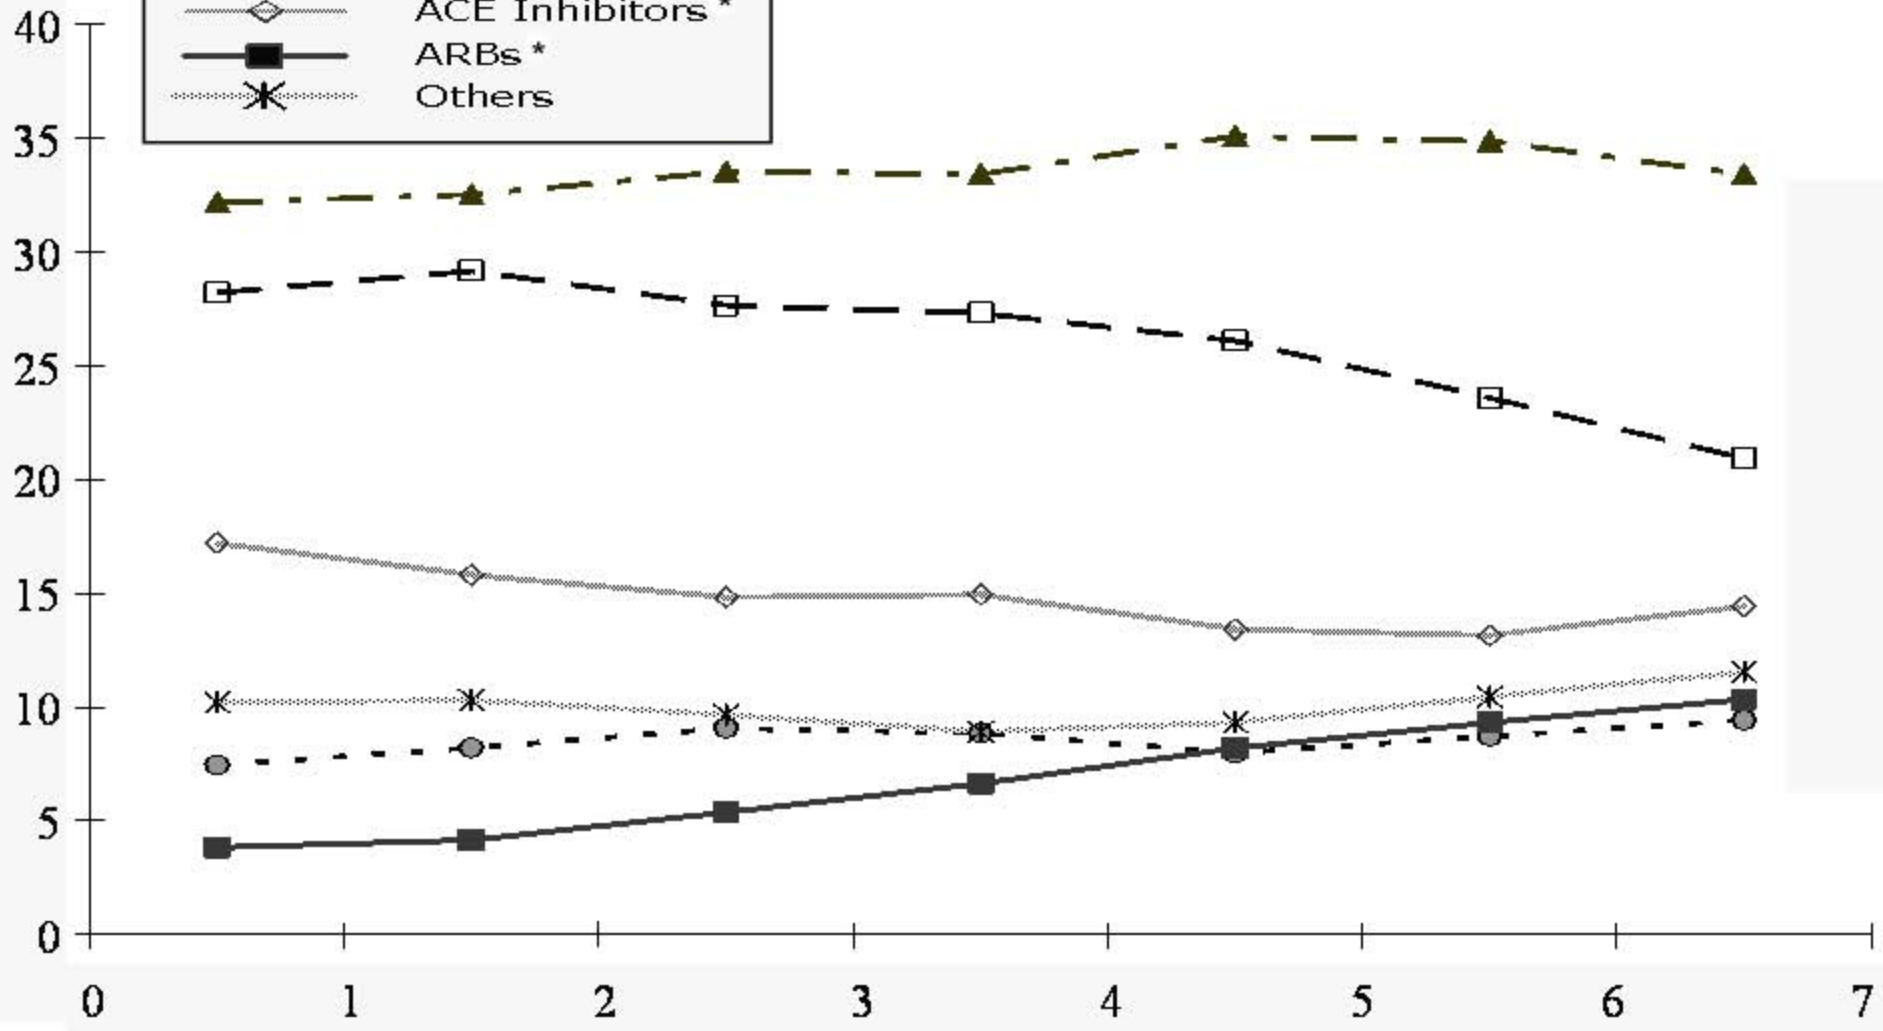

Time Elapsed since Initial Anti-hypertensive Treatment (years)

Supplement: MOESM3 [file 9535346]
